# Supplementary material for: The electronic properties of CH3NH3PbI3 perovskite surfaces tuned by inverted polarities of pyridine and ethylamine
Source: Royal Society of Chemistry journal article supplement (doi:10.1039/c8tc00409a), 2018-01-01
Supplement: c8tc00409a1.pdf [file c8tc00409a1.pdf]

## Electronic Supplementary Information

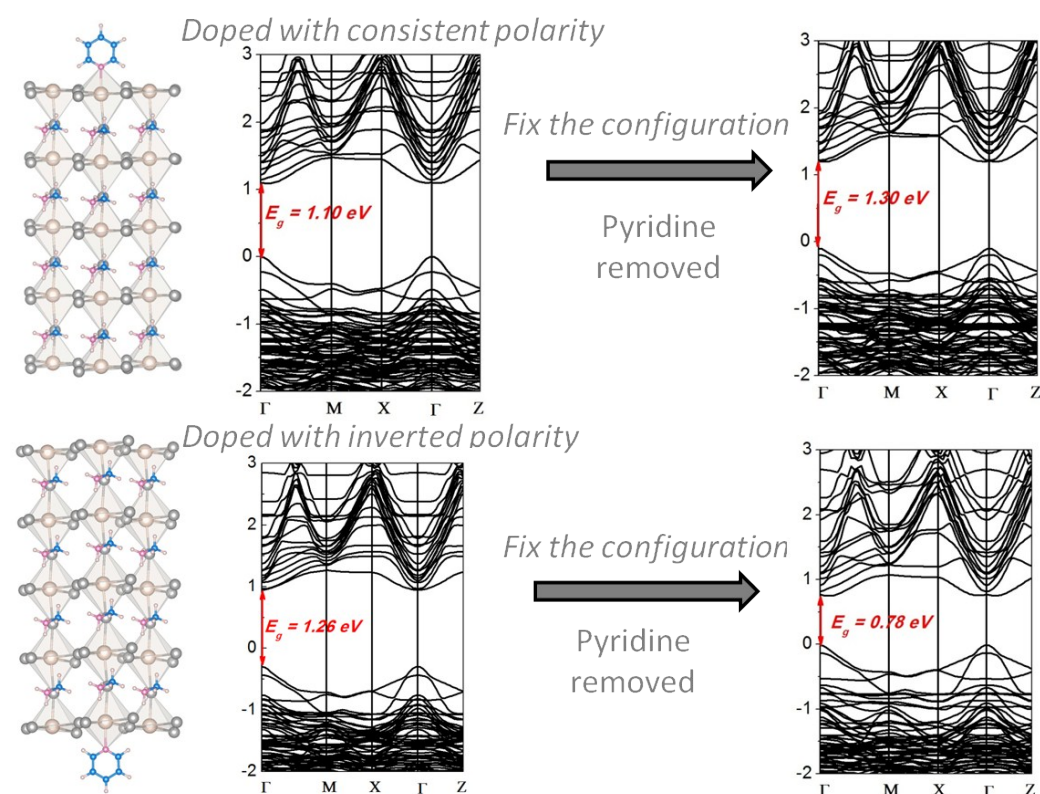

Supplementary Fig. 1. The band structures of two pyridine doped systems and the corresponding ones of the same configurations after removing the pyridine

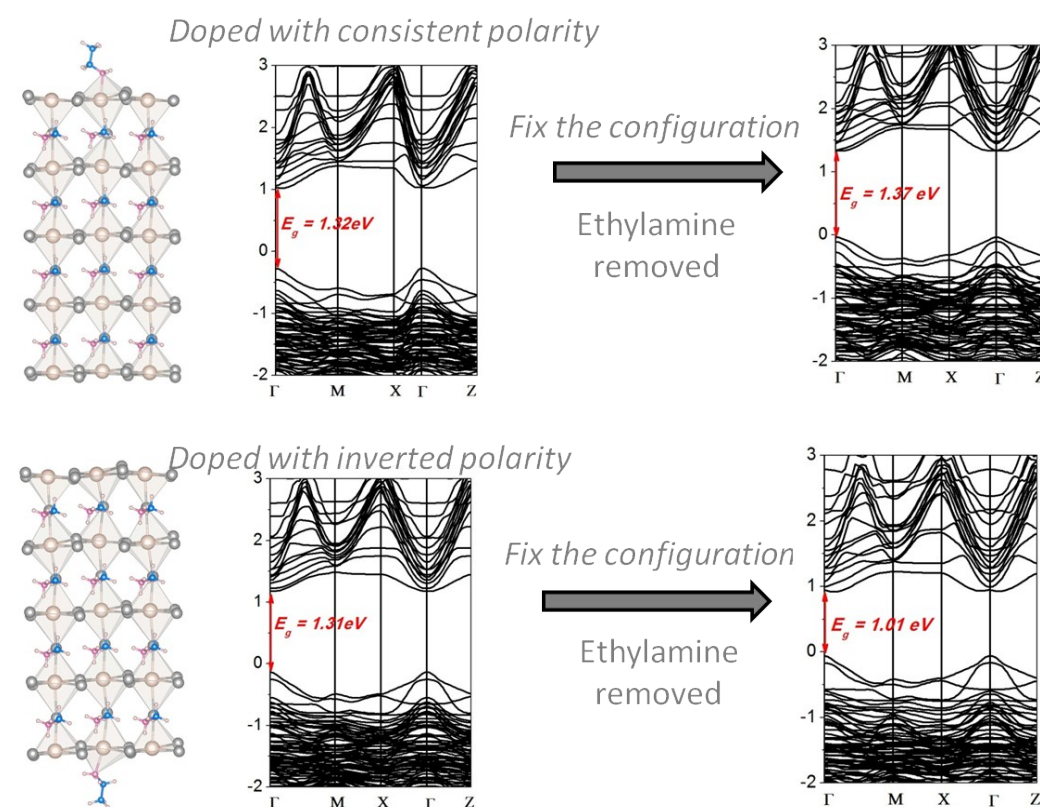

Supplementary Fig. 2. The band structures of two ethylamine doped systems and the

corresponding ones of the same configurations after removing the ethylamine.

Supplementary Table I. The difference of band gap values before and after removing the dopants, including pyridine and ethylamine on the preovskite surfaces.

| <b>Dopant</b>    | <b>Band gap (eV)</b> | <b>Removed dopant</b> | <b>Gap influenced by<br/>dopant polarities</b> |
|------------------|----------------------|-----------------------|------------------------------------------------|
| Pyridine (top)   | 1.10                 | 1.30                  | -0.20                                          |
| (bottom)         | 1.26                 | 0.78                  | 0.48                                           |
| Ethylamine (top) | 1.32                 | 1.37                  | -0.05                                          |
| (bottom)         | 1.31                 | 1.01                  | 0.30                                           |
